# Supplementary material
Source: PubMed Central journal article supplement (PMC4209254)
Supplement: NIHMS635396-supplement-01.pdf [file NIHMS635396-supplement-01.pdf]

**TABLE E1.** Primers used for ChIP assay

|               | Gene                 | Sequence (5' → 3')                                     |
|---------------|----------------------|--------------------------------------------------------|
| STAT3 binding | <i>Etv5</i> proximal | F-GGTGCTGATTGGTCAATGG<br>R-CTGCCCATCACCTCTTGTTT        |
|               | <i>Etv5</i> distal   | F-TACACATGGGTGTTAGCGAA<br>R-CCTGCCTGTGTCATGATAGG       |
| Etv5 binding  | <i>Il17</i> CNS1     | F-GGAAGGTGCATGTGGCTGACTT<br>R-AATGTGCCAGTCCCTTGGATGA   |
|               | <i>Il17</i> CNS2     | F-GCCTCCCATGTGGTCATTAT<br>R-AGGCTCCTTCTCCATTGGTT       |
|               | <i>Il17</i> CNS3     | F-TTTGCTCATGCCCATATGTC<br>R-TGAACCAACTTCCCCACTC        |
|               | <i>Il17</i> CNS4     | F-CTCAAATCCGTGTGCCTTCT<br>R-CATCTTGAAGCTGAGGCTGA       |
|               | <i>Il17</i> CNS5     | F-ACAGCCACACAACTCCCCACTC<br>R-GGGCCTCCAAAATGACCTTCAC   |
|               | <i>Il17</i> CNS6     | F-ACAGGTGACCGCCAATAAAC<br>R-GACATACCACAGCCCTTCGT       |
|               | <i>Il17</i> CNS7     | F-TGGCAAGGGGTAGGGTCAATCT<br>R-GCAGACAGTGAGCAGGGCTTTC   |
|               | <i>Il17</i> CNS8     | F-ATGGTGGCCCTTAAAGCAGGAA<br>R-CATGGGATCCTGGCTCATTCTC   |
|               | <i>Il17ap</i>        | F-GCCTTTGTGATTGTTTCTTGACAG<br>R-CCTTGCCCAAAGAAACCCTCTC |
|               | <i>Il17fp</i>        | F-GGGAATCAAAGGGGGACCCTAA<br>R-AAAGCAGAACCCACACGCAGAG   |

F, Forward; R, reverse.

**TABLE E2.** TaqMan primers used for qRT-PCR

| <b>Gene</b>   | <b>Product catalog number<br/>(Life Technologies)</b> |
|---------------|-------------------------------------------------------|
| <i>B2m</i>    | Mm00437762_m1                                         |
| <i>Batf</i>   | Mm00479410_m1                                         |
| <i>Ccl17</i>  | Mm00516136_m1                                         |
| <i>Ccl22</i>  | Mm00436439_m1                                         |
| <i>Clca3</i>  | Mm01320697_m1                                         |
| <i>Cxcl1</i>  | Mm04207460_m1                                         |
| <i>Cxcl2</i>  | Mm00436450_m1                                         |
| <i>Etv5</i>   | Mm00465816_m1                                         |
| <i>Gata3</i>  | Mm00484683_m1                                         |
| <i>Ifng</i>   | Mm01168134_m1                                         |
| <i>Il17a</i>  | Mm00439618_m1                                         |
| <i>Il4</i>    | Mm00445259_m1                                         |
| <i>Irf4</i>   | Mm00516431_m1                                         |
| <i>Maf</i>    | Mm01247672_m1                                         |
| <i>Muc5ac</i> | Mm01276718_m1                                         |
| <i>Rorc</i>   | Mm01261022_m1                                         |
| <i>Tbx21</i>  | Mm00450960_m1                                         |
